# Supplementary material for: Antioxidant Ability and Mechanism of Rhizoma Atractylodes macrocephala
Source: PubMed Central journal article supplement (PMC6268131; doi:10.3390/molecules171113457), 2012-11-13

# Support Information

## Part 1. Photos.

**Figure S1-1.** The plants of *Rhizoma Atractylodes macrocephala*.

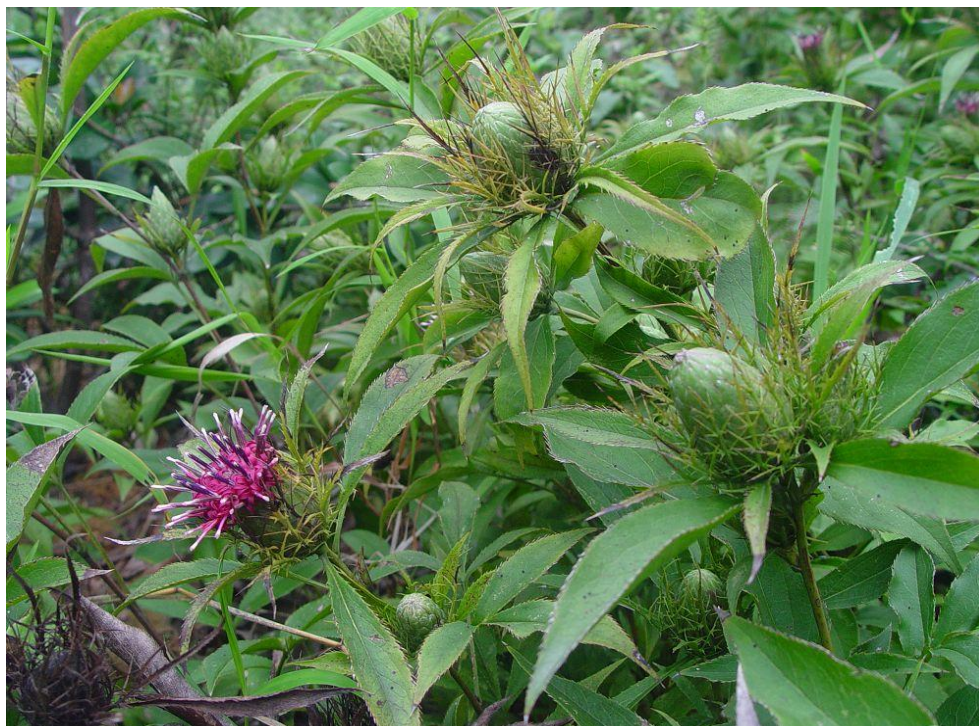

Contributed by Jian Lin, Oct. 11, 2012, Yaowang Mountain, Changzhou University of Chinese medicine, Guangzhou, China, 510006.

**Figure S1-2.** Dried *Rhizoma Atractylodes macrocephala*.

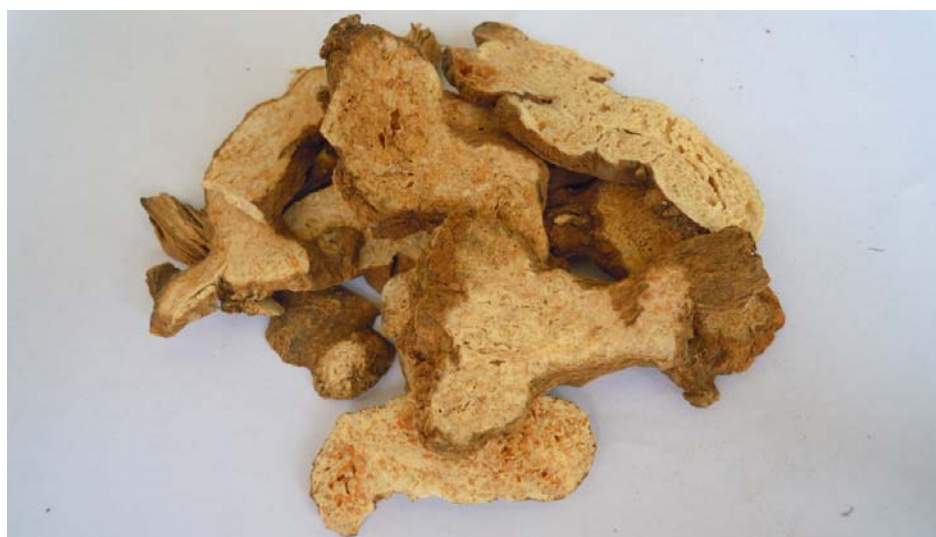

Contributed by Jing Lin, Oct. 11, 2012, Changzhou University of Chinese Medicine, Guangzhou, China, 510006.

**Part 2.** The calculations of total phenolics, total flavonoids, total sugars and total saponins.

**Figure S2-1.** The standard curve of pyrogallol ( $y = 45.225x + 0.0309$ ,  $R = 0.9985$ ).

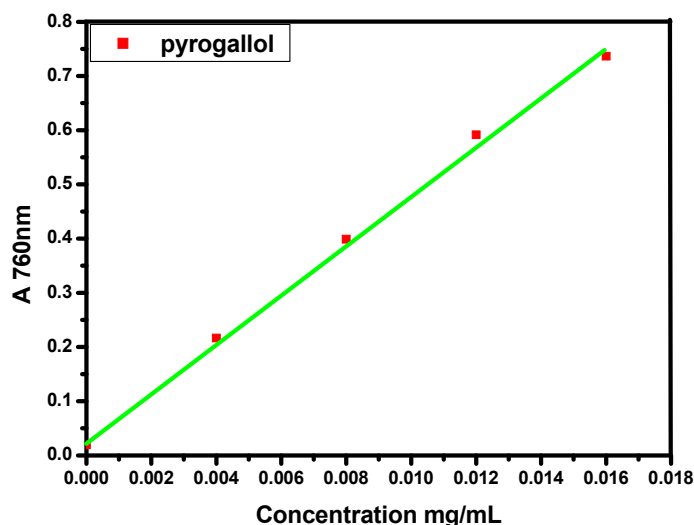

**Table S2-1.** The total phenolics contents of five AM extracts.

|                              | PEAM                            | EAAM                             | AEAM                             | 95EAM                            | WAM                             |
|------------------------------|---------------------------------|----------------------------------|----------------------------------|----------------------------------|---------------------------------|
| A <sub>760nm</sub>           | 0.338                           | 0.463                            | 0.299                            | 0.221                            | 0.052                           |
|                              | 0.338                           | 0.465                            | 0.299                            | 0.221                            | 0.053                           |
|                              | 0.338                           | 0.465                            | 0.301                            | 0.220                            | 0.054                           |
| Content<br>(mg pyrogallol/g) | 15.31695                        | 20.97008                         | 13.64363                         | 10.02563                         | 2.3826                          |
|                              | 15.31695                        | 21.06053                         | 13.64363                         | 10.02563                         | 2.427825                        |
|                              | 15.31695                        | 21.06053                         | 13.55318                         | 9.9804                           | 2.47305                         |
| Mean ± SD                    | <u>15.32 ± 0.00<sup>d</sup></u> | <u>21.03 ± 0.052<sup>e</sup></u> | <u>13.61 ± 0.052<sup>c</sup></u> | <u>10.01 ± 0.026<sup>b</sup></u> | <u>2.43 ± 0.045<sup>a</sup></u> |

PEAM, petroleum ether extract of *Rhizoma Atractylodes macrocephala*. EAAM, ethyl acetate extract of *Rhizoma Atractylodes macrocephala*. AEAM, absolute ethanol extract of *Rhizoma Atractylodes macrocephala*. 95EAM, 95% ethanol extract of *Rhizoma Atractylodes macrocephala*. WAM, water extract of *Rhizoma Atractylodes macrocephala*.

**Figure S2-2.** The standard curve of rutin ( $y = 11.047x - 0.0105$ ,  $R = 0.9988$ ).

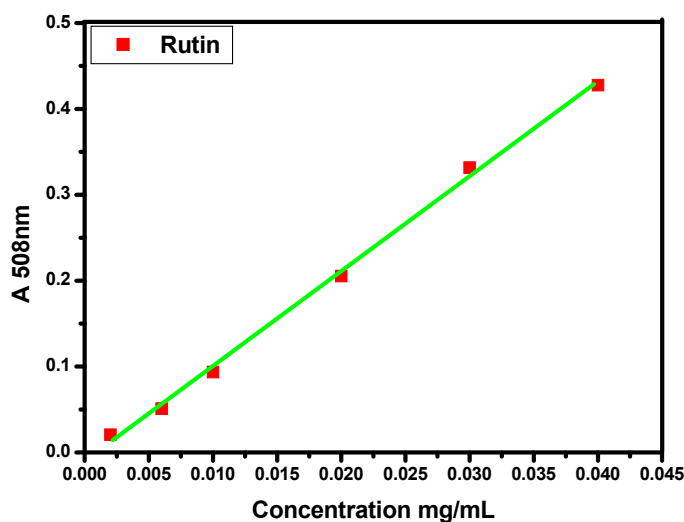

**Table S2-2.** The total flavonoids contents of five AM extracts.

|                         | PEAM                             | EAAM                            | AEAM                           | 95EAM                          | WAM                              |
|-------------------------|----------------------------------|---------------------------------|--------------------------------|--------------------------------|----------------------------------|
| A <sub>760nm</sub>      | 0.305                            | 0.261                           | 0.046                          | 0.19                           | 0.004                            |
|                         | 0.306                            | 0.262                           | 0.046                          | 0.19                           | 0.003                            |
|                         | 0.305                            | 0.263                           | 0.046                          | 0.19                           | 0.003                            |
| Content<br>(mg rutin/g) | 3.358835                         | 2.872767                        | 0.497662                       | 2.08843                        | 0.033688                         |
|                         | 3.369882                         | 2.883814                        | 0.497662                       | 2.08843                        | 0.022641                         |
|                         | 3.358835                         | 2.894861                        | 0.497662                       | 2.08843                        | 0.022641                         |
| Mean ± SD               | <u>3.36 ± 0.0064<sup>d</sup></u> | <u>2.88 ± 0.011<sup>c</sup></u> | <u>0.50 ± 0.00<sup>b</sup></u> | <u>2.09 ± 0.00<sup>c</sup></u> | <u>0.026 ± 0.064<sup>a</sup></u> |

PEAM, petroleum ether extract of Rhizoma *Atractylodes macrocephala*. EAAM, ethyl acetate extract of Rhizoma *Atractylodes macrocephala*. AEAM, absolute ethanol extract of Rhizoma *Atractylodes macrocephala*. 95EAM, 95% ethanol extract of Rhizoma *Atractylodes macrocephala*. WAM, water extract of Rhizoma *Atractylodes macrocephala*.

**Figure S2-3.** The standard curve of glucose ( $y = 4.3x - 0.0036$ ,  $R = 0.9968$ ).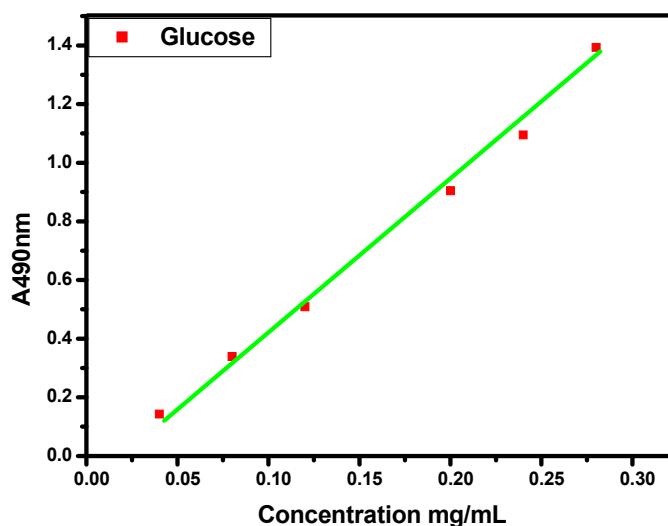**Table S2-3.** The total sugars contents of five AM extracts.

|                           | PEAM                            | EAAM                             | AEAM                           | 95EAM                           | WAM                              |
|---------------------------|---------------------------------|----------------------------------|--------------------------------|---------------------------------|----------------------------------|
| A <sub>760nm</sub>        | 0.262                           | 0.357                            | 1.156                          | 1.165                           | 0.828                            |
|                           | 0.256                           | 0.361                            | 1.156                          | 1.159                           | 0.830                            |
|                           | 0.255                           | 0.360                            | 1.156                          | 1.158                           | 0.827                            |
| Content<br>(mg glucose/g) | 1.123                           | 1.5315                           | 4.9672                         | 5.0059                          | 3.5568                           |
|                           | 1.0972                          | 1.5487                           | 4.9672                         | 4.9801                          | 3.5654                           |
|                           | 1.0929                          | 1.5444                           | 4.9672                         | 4.9758                          | 3.5525                           |
| Mean ± SD                 | <u>1.10 ± 0.016<sup>a</sup></u> | <u>1.54 ± 0.0090<sup>a</sup></u> | <u>4.97 ± 0.00<sup>c</sup></u> | <u>4.99 ± 0.016<sup>c</sup></u> | <u>3.56 ± 0.0066<sup>b</sup></u> |

PEAM, petroleum ether extract of Rhizoma *Atractylodes macrocephala*. EAAM, ethyl acetate extract of Rhizoma *Atractylodes macrocephala*. AEAM, absolute ethanol extract of Rhizoma *Atractylodes macrocephala*. 95EAM, 95% ethanol extract of Rhizoma *Atractylodes macrocephala*. WAM, water extract of Rhizoma *Atractylodes macrocephala*.

**Figure S2-4.** The standard curve of oleanolic acid ( $y = 36.894x - 0.0089$ ,  $R = 0.9984$ ).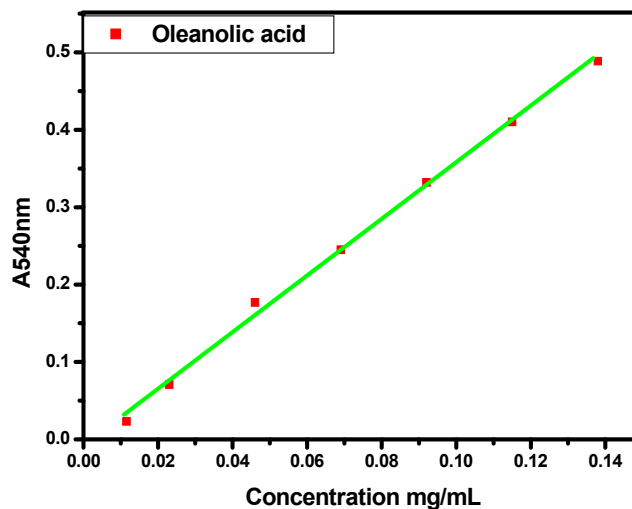**Table S2-4.** The total saponins contents of five AM extracts.

|                                  | PEAM                                            | EAAM                                          | AEAM                                          | 95EAM                                         | WAM                                             |
|----------------------------------|-------------------------------------------------|-----------------------------------------------|-----------------------------------------------|-----------------------------------------------|-------------------------------------------------|
| $A_{760\text{nm}}$               | 0.407                                           | 0.165                                         | 0.132                                         | 0.066                                         | 0.066                                           |
|                                  | 0.406                                           | 0.162                                         | 0.140                                         | 0.063                                         | 0.075                                           |
|                                  | 0.406                                           | 0.168                                         | 0.142                                         | 0.073                                         | 0.071                                           |
| Content<br>(mg oleanolic acid/g) | 15.00696                                        | 6.07861                                       | 4.861108                                      | 2.426104                                      | 2.426104                                        |
|                                  | 14.97006                                        | 5.967928                                      | 5.15626                                       | 2.315422                                      | 2.75815                                         |
|                                  | 14.97006                                        | 6.189292                                      | 5.230048                                      | 2.684362                                      | 2.610574                                        |
| Mean $\pm$ SD                    | <u>14.98 <math>\pm</math> 0.021<sup>d</sup></u> | <u>6.08 <math>\pm</math> 0.11<sup>c</sup></u> | <u>5.08 <math>\pm</math> 0.20<sup>c</sup></u> | <u>2.48 <math>\pm</math> 0.19<sup>b</sup></u> | <u>0.026 <math>\pm</math> 0.064<sup>a</sup></u> |

PEAM, petroleum ether extract of *Rhizoma Atractylodes macrocephala*. EAAM, ethyl acetate extract of *Rhizoma Atractylodes macrocephala*. AEAM, absolute ethanol extract of *Rhizoma Atractylodes macrocephala*. 95EAM, 95% ethanol extract of *Rhizoma Atractylodes macrocephala*. WAM, water extract of *Rhizoma Atractylodes macrocephala*.

### Part 3. The $1/IC_{50}$ values.

**Table S3-1.** The  $1/IC_{50}$  values of five AM extracts in various antioxidant assays.

|                            | PEAM    | EAAM    | AEAM    | 95EAM   | WAM     |
|----------------------------|---------|---------|---------|---------|---------|
| $\bullet$ OH scavenging    | 0.00238 | 0.00712 | 0.00953 | 0.00516 | 0.00280 |
| $\bullet O_2^-$ scavenging | 0.00081 | 0.00143 | 0.00090 | 0.00093 | 0.00046 |
| $Fe^{2+}$ chelating        | 0.00701 | 0.00329 | 0.00184 | 0.00327 | 0.00143 |
| $Cu^{2+}$ chelating        | 0.00741 | 0.00391 | 0.00098 | 0.00197 | 0.00015 |
| DPPH $\bullet$ scavenging  | 0.00069 | 0.00418 | 0.00288 | 0.00224 | 0.00093 |
| ABTS $^+$ scavenging       | 0.00187 | 0.01278 | 0.00714 | 0.00817 | 0.00212 |
| $Fe^{3+}$ reducing         | 0.00226 | 0.00507 | 0.00243 | 0.00238 | 0.00150 |
| $Cu^{2+}$ reducing         | 0.00727 | 0.01201 | 0.00622 | 0.00748 | 0.00360 |

PEAM, petroleum ether extract of *Rhizoma Atractylodes macrocephala*. EAAM, ethyl acetate extract of *Rhizoma Atractylodes macrocephala*. AEAM, absolute ethanol extract of *Rhizoma Atractylodes macrocephala*. 90EAM, 95% ethanol extract of *Rhizoma Atractylodes macrocephala*. WAM, water extract of *Rhizoma Atractylodes macrocephala*.  $IC_{50}$  values are listed in Table 1 in the main text.

**Part 4.** The HPLC analysis for caffeic acid and ferulic acid.**Figure S4-1.** The HPLC profiles of standard caffeic acid and ferulic acid (A), PEAM (B), EAAM (C), AEAM (D), 95EAM (E), and WAM (F).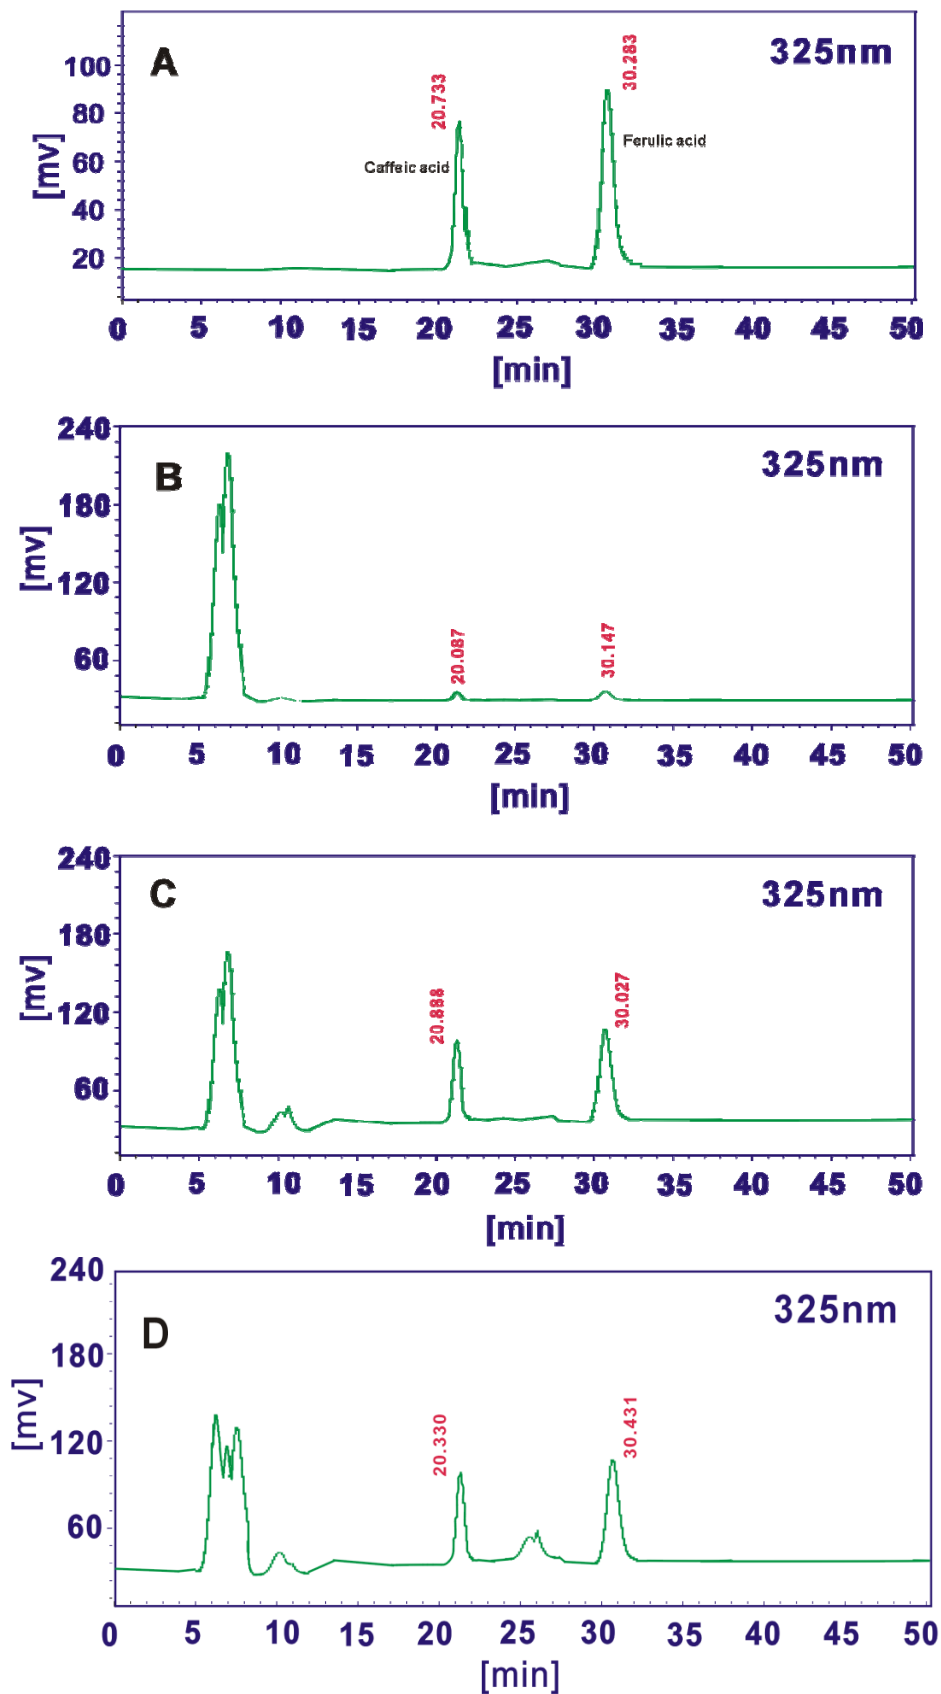

Figure S4-1. Cont.

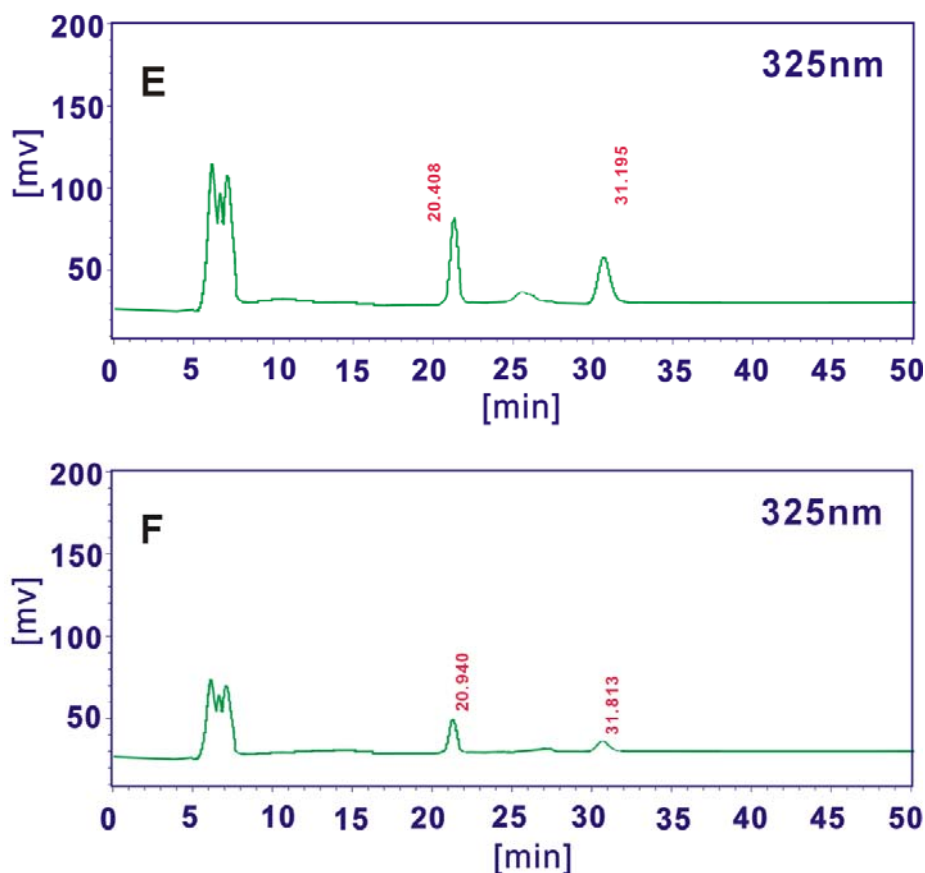

Syltech P510 system (Los Angeles, CA, USA), Dikma Diamonsil C<sub>18</sub> (250 mm × 4.6 mm, 5 μm) column, methanol:acetonitrile:5% acetate acid (24:6:70), 0.5 mL/min flow rate, 10 μL injection, 325 nm wavelength. PEAM, petroleum ether extract of *Rhizoma Atractylodes macrocephala*. EAAM, ethyl acetate extract of *Rhizoma Atractylodes macrocephala*. AEAM, absolute ethanol extract of *Rhizoma Atractylodes macrocephala*. 95EAM, 95% ethanol extract of *Rhizoma Atractylodes macrocephala*. WAM, water extract of *Rhizoma Atractylodes macrocephala*.

**Table S4-1.** The retention time, peak area of caffeic acid and ferulic acid in five extracts from *Rhizoma Atractylodes macrocephala*.

|       | Compound     | Retention time/min | Peak area                 |
|-------|--------------|--------------------|---------------------------|
| PEAM  | caffeic acid | 20.087             | <u>5530.33 ± 684.22</u>   |
|       | ferulic acid | 30.147             | <u>7768.53 ± 584.85</u>   |
| EAAM  | caffeic acid | 20.888             | <u>15863.98 ± 1254.02</u> |
|       | ferulic acid | 30.027             | <u>22358.69 ± 2001.20</u> |
| AEAM  | caffeic acid | 20.330             | <u>6466.64 ± 655.75</u>   |
|       | ferulic acid | 30.431             | <u>8878.73 ± 784.76</u>   |
| 95EAM | caffeic acid | 20.408             | <u>5990.33 ± 94.99</u>    |
|       | ferulic acid | 31.195             | <u>7968.53 ± 324.90</u>   |
| WAM   | caffeic acid | 20.940             | <u>4333.34 ± 194.72</u>   |
|       | ferulic acid | 31.813             | <u>5013.33 ± 424.87</u>   |

PEAM, petroleum ether extract of *Rhizoma Atractylodes macrocephala*. EAAM, ethyl acetate extract of *Rhizoma Atractylodes macrocephala*. AEAM, absolute ethanol extract of *Rhizoma Atractylodes macrocephala*. 95EAM, 95% ethanol extract of *Rhizoma Atractylodes macrocephala*. WAM, water extract of *Rhizoma Atractylodes macrocephala*.

**Part 5.** The HPLC analysis for protocatechuic acid.

**Figure S5-1.** The HPLC profiles of (A) standard protocatechuic acid; and (B) petroleum ether extract from *Rhizoma Atractylodes macrocephala* (PEAM); (C) ethyl acetate extract from *Rhizoma Atractylodes macrocephala* (EAAM); (D) absolute ethanol extract from *Rhizoma Atractylodes macrocephala* (AEAM); (E) 95% ethanol extract from *Rhizoma Atractylodes macrocephala* (95EAM); (F) water extract from *Rhizoma Atractylodes macrocephala* (WAM).

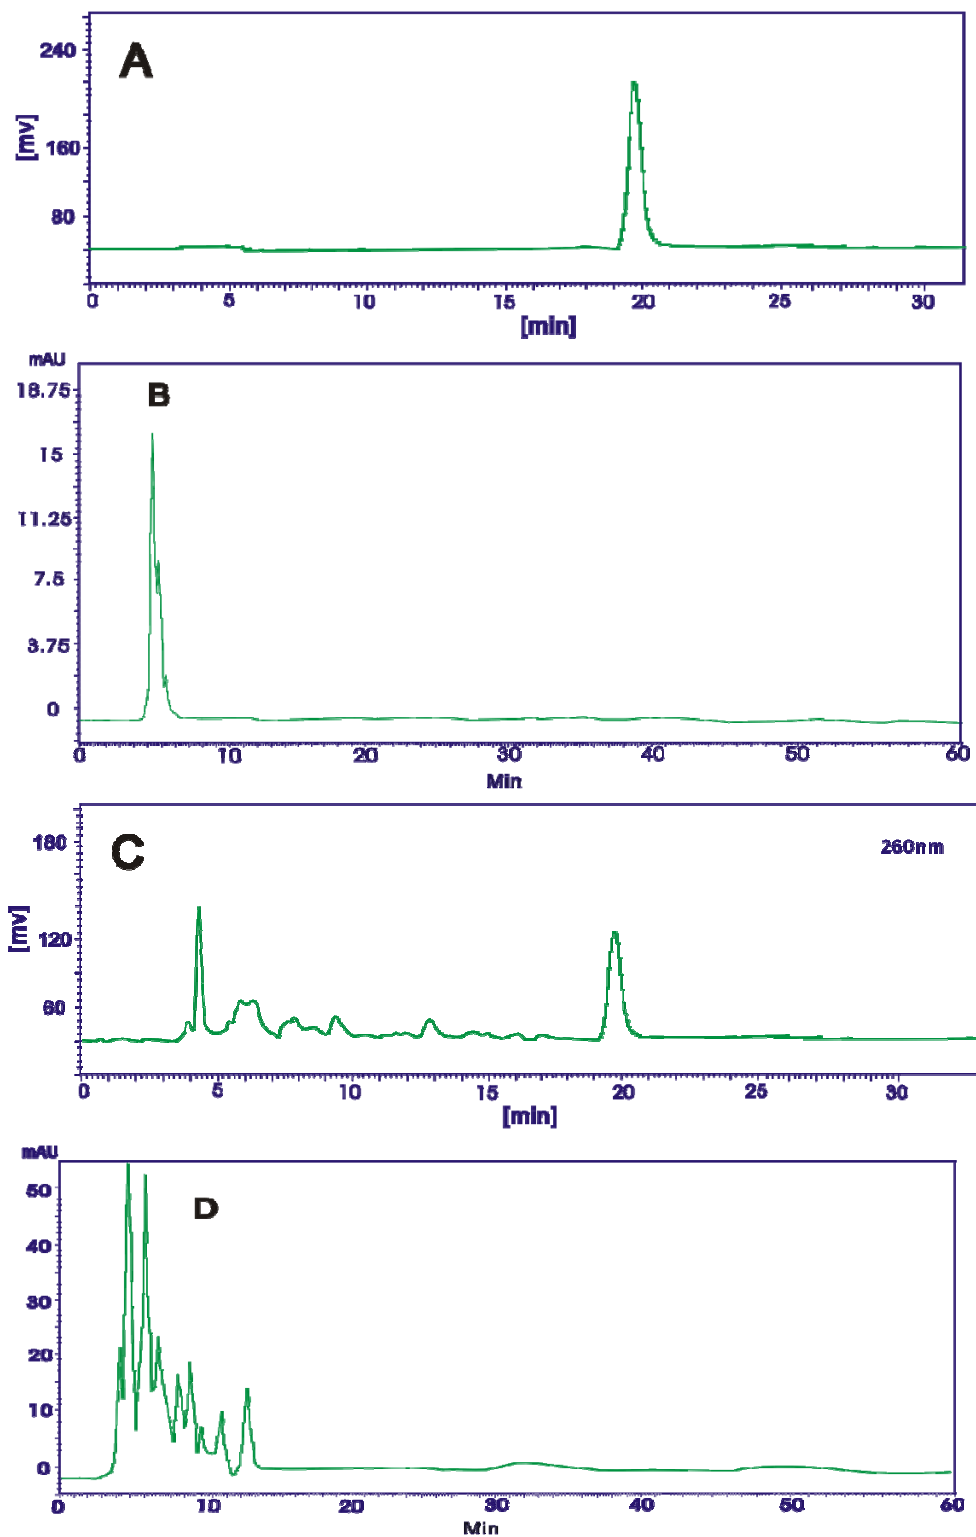

Figure S5-1. Cont.

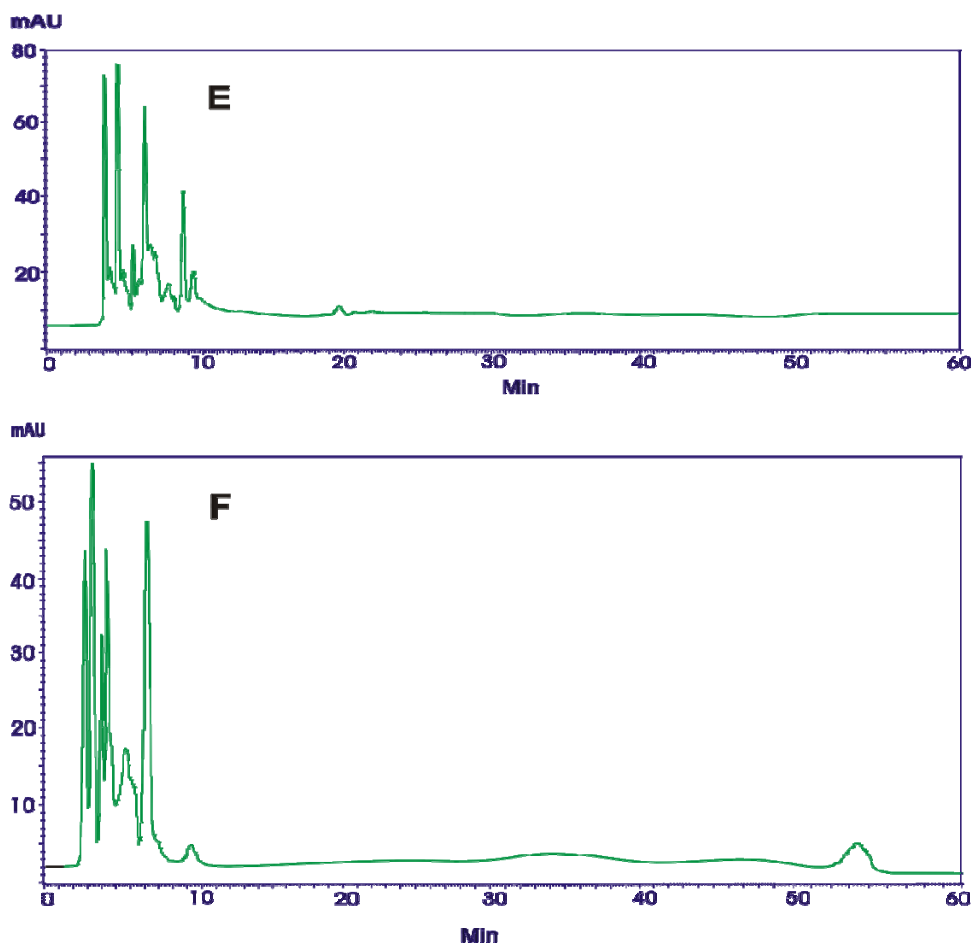

Syltech P510 system (Los Angeles, CA, USA), Dikma Diamonsil C<sub>18</sub> (250 mm × 4.6 mm, 5 μm) column, 1.0 mL/min flow rate, methanol/acetonitrile/5% acetate acid (12:3:10), 10 μL injection, 60 nm wavelength.

**Table S5-1.** The retention times and peak areas of protocatechuic acid in five AM extracts.

|       | Retention time/min | Peak area *      |
|-------|--------------------|------------------|
| PEAM  | 20.8               | 0                |
| EAAM  | 20.8               | 463523 ± 44277.3 |
| AEAM  | 20.8               | 0                |
| 95EAM | 20.8               | 51570.5 ± 714.89 |
| WAM   | 20.8               | 0                |

\* The values are expressed as Mean ± SD ( $n = 3$ ). PEAM, petroleum ether extract of *Rhizoma Atractylodes macrocephala*. EAAM, ethyl acetate extract of *Rhizoma Atractylodes macrocephala*. AEAM, absolute ethanol extract of *Rhizoma Atractylodes macrocephala*. 95EAM, 95% ethanol extract of *Rhizoma Atractylodes macrocephala*. WAM, water extract of *Rhizoma Atractylodes macrocephala*.



## Part 6. The correlation graphs (56 in total).

**Figure S6-1.** The correlation graphs between total phenolics and antioxidant levels. (A) for  $\bullet\text{OH}$  assay; (B) for  $\bullet\text{O}_2^-$  assay; (C) for  $\text{Fe}^{2+}$  chelating ability assay; (D) for  $\text{Cu}^{2+}$  chelating ability assay; (E) for DPPH assay; (F) for ABTS assay; (G) for  $\text{Fe}^{3+}$  reducing power assay; (H) for  $\text{Cu}^{2+}$  reducing power assay.

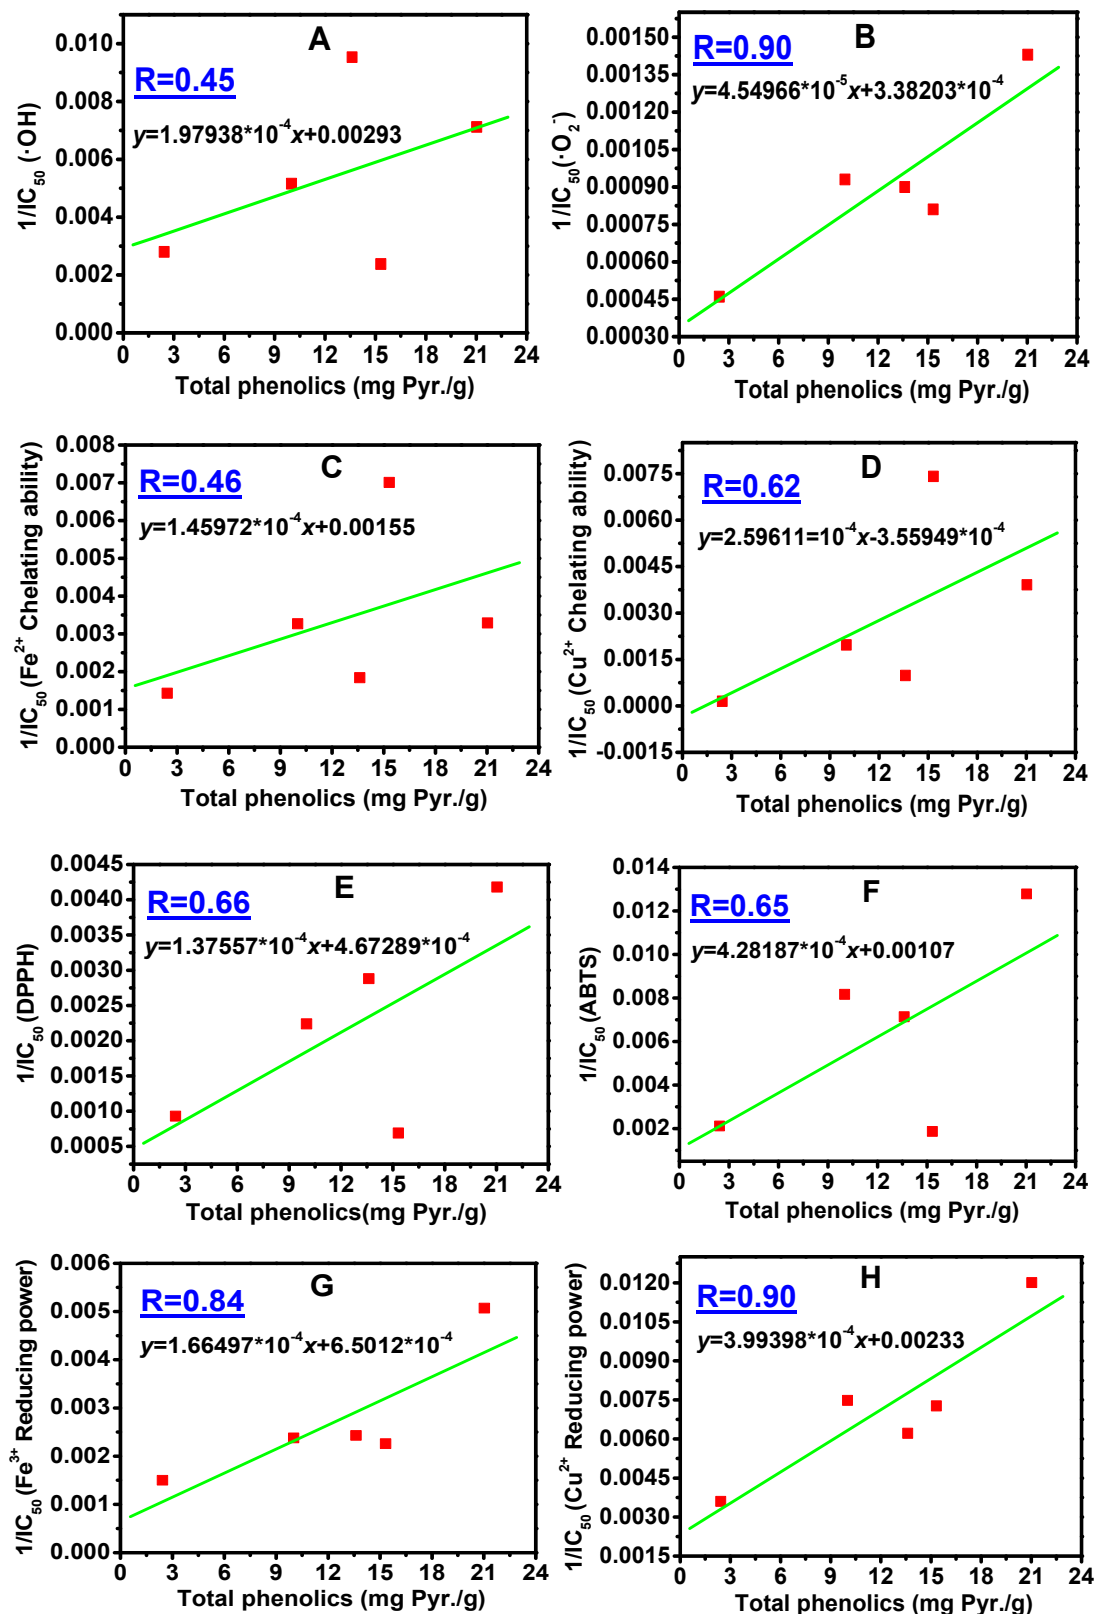

**Figure S6-2.** The correlation graphs between total flavone and antioxidant levels. (A) for  $\cdot\text{OH}$  assay; (B) for  $\cdot\text{O}_2^-$  assay; (C) for  $\text{Fe}^{2+}$  chelating ability assay; (D) for  $\text{Cu}^{2+}$  chelating ability assay; (E) for DPPH assay; (F) for ABTS assay; (G) for  $\text{Fe}^{3+}$  reducing power assay; (H) for  $\text{Cu}^{2+}$  reducing power assay.

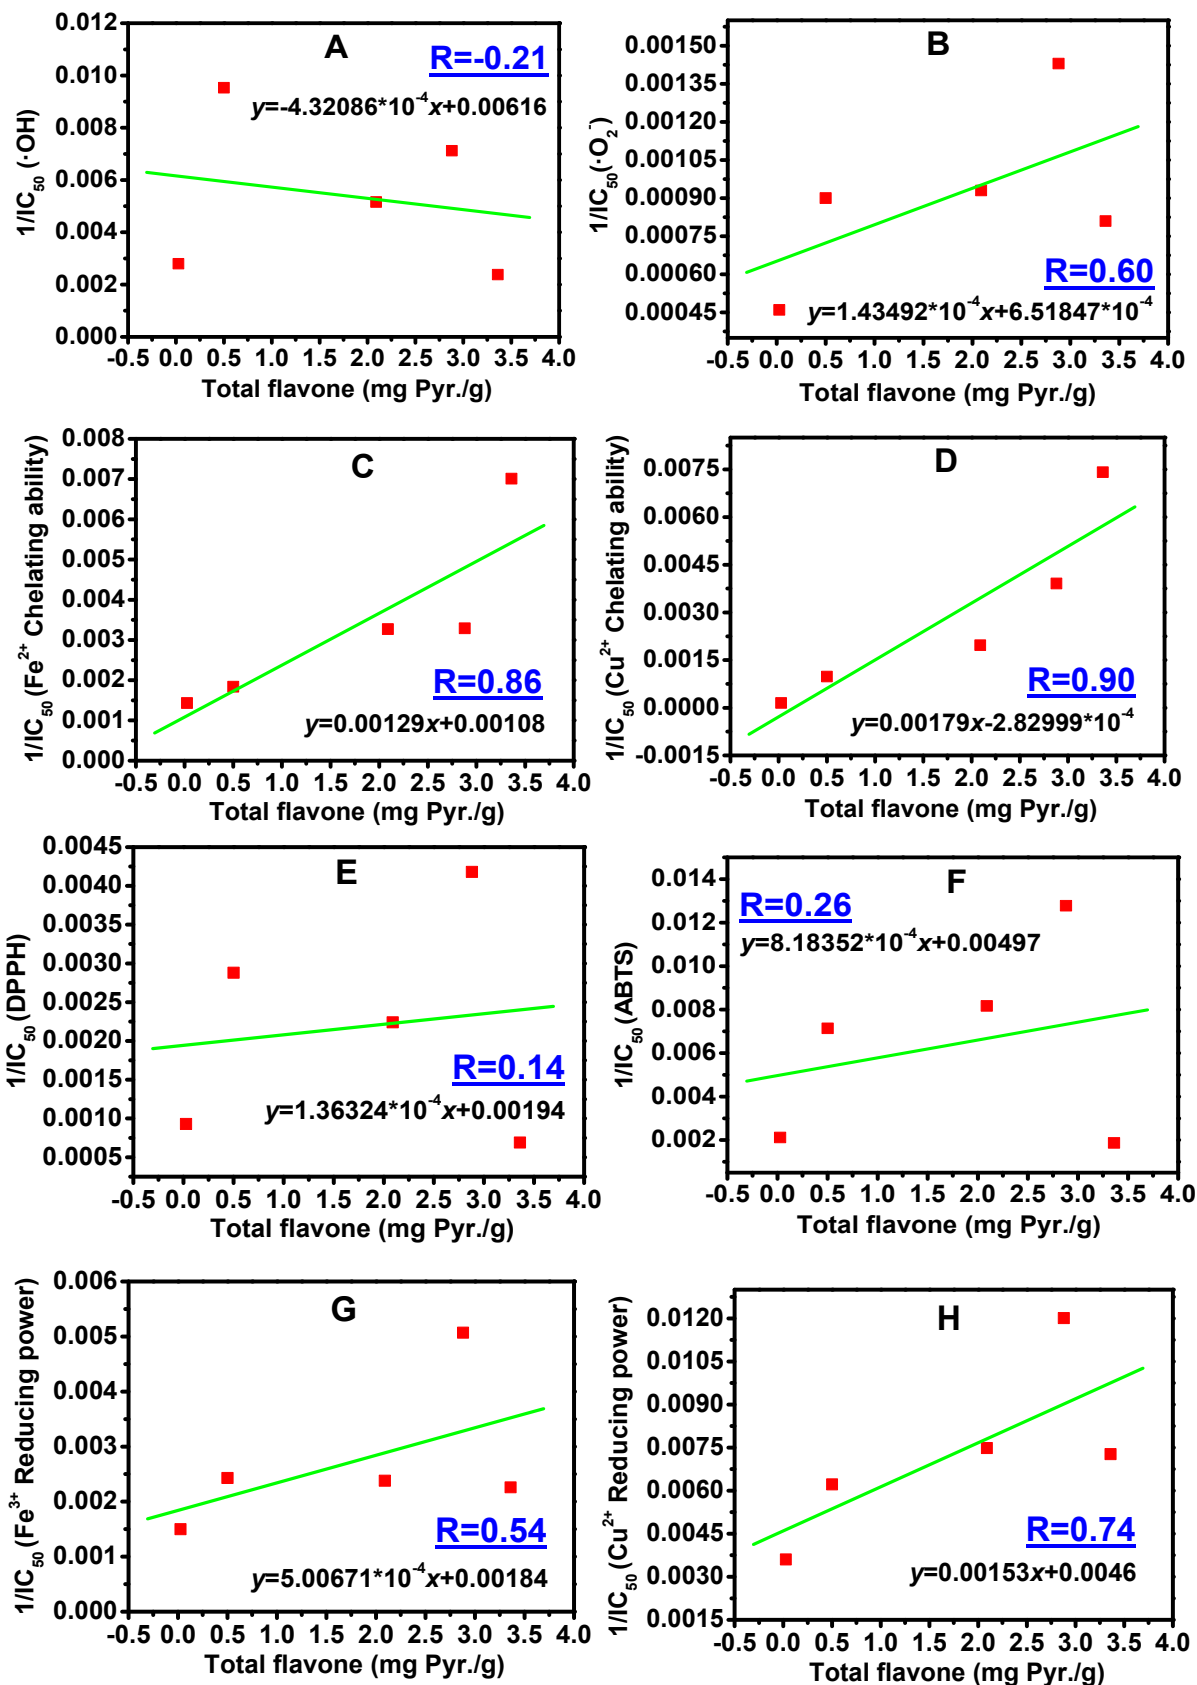

**Figure S6-3.** The correlation graphs between total sugars and antioxidant levels. (A) for  $\cdot\text{OH}$  assay; (B) for  $\cdot\text{O}_2^-$  assay; (C) for  $\text{Fe}^{2+}$  chelating ability assay; (D) for  $\text{Cu}^{2+}$  chelating ability assay; (E) for DPPH assay; (F) for ABTS assay; (G) for  $\text{Fe}^{3+}$  reducing power assay; (H) for  $\text{Cu}^{2+}$  reducing power assay.

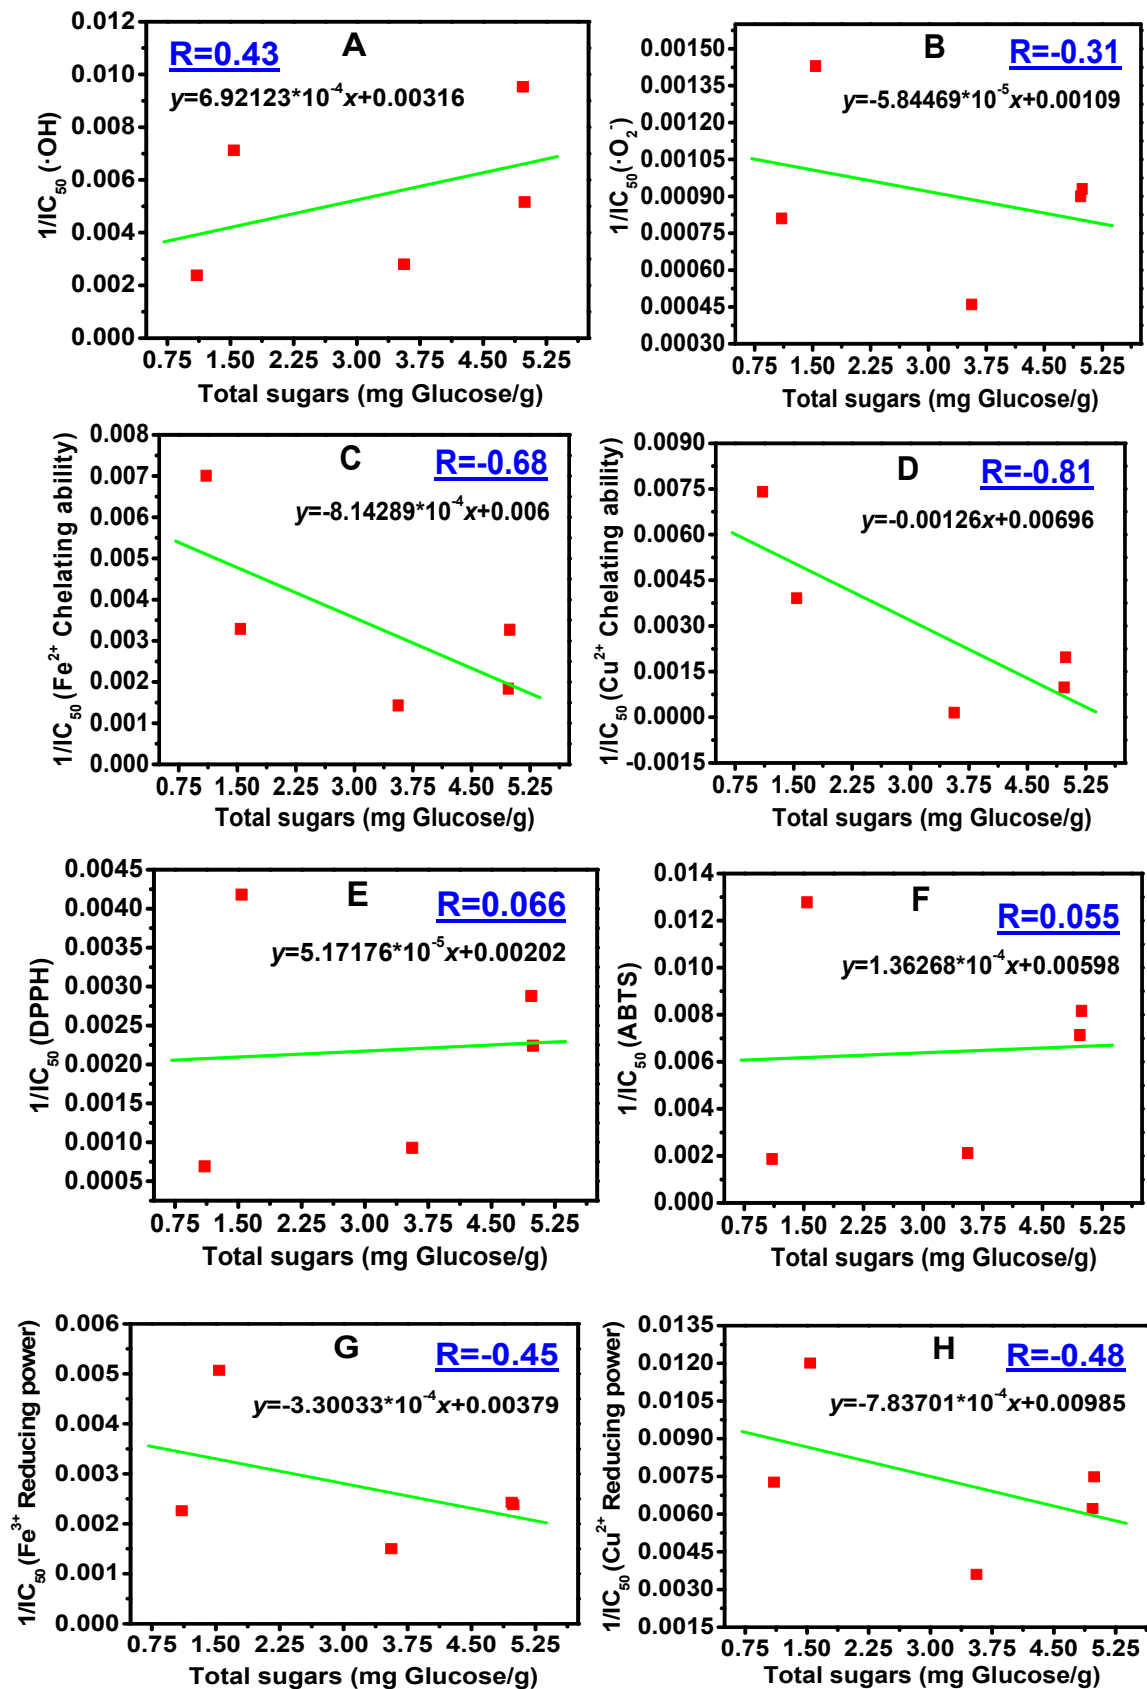

**Figure S6-4.** The correlation graphs between total saponins and antioxidant levels. (A) for  $\cdot\text{OH}$  assay; (B) for  $\cdot\text{O}_2^-$  assay; (C) for  $\text{Fe}^{2+}$  chelating ability assay; (D) for  $\text{Cu}^{2+}$  chelating ability assay; (E) for DPPH assay; (F) for ABTS assay; (G) for  $\text{Fe}^{3+}$  reducing power assay; (H) for  $\text{Cu}^{2+}$  reducing power assay.

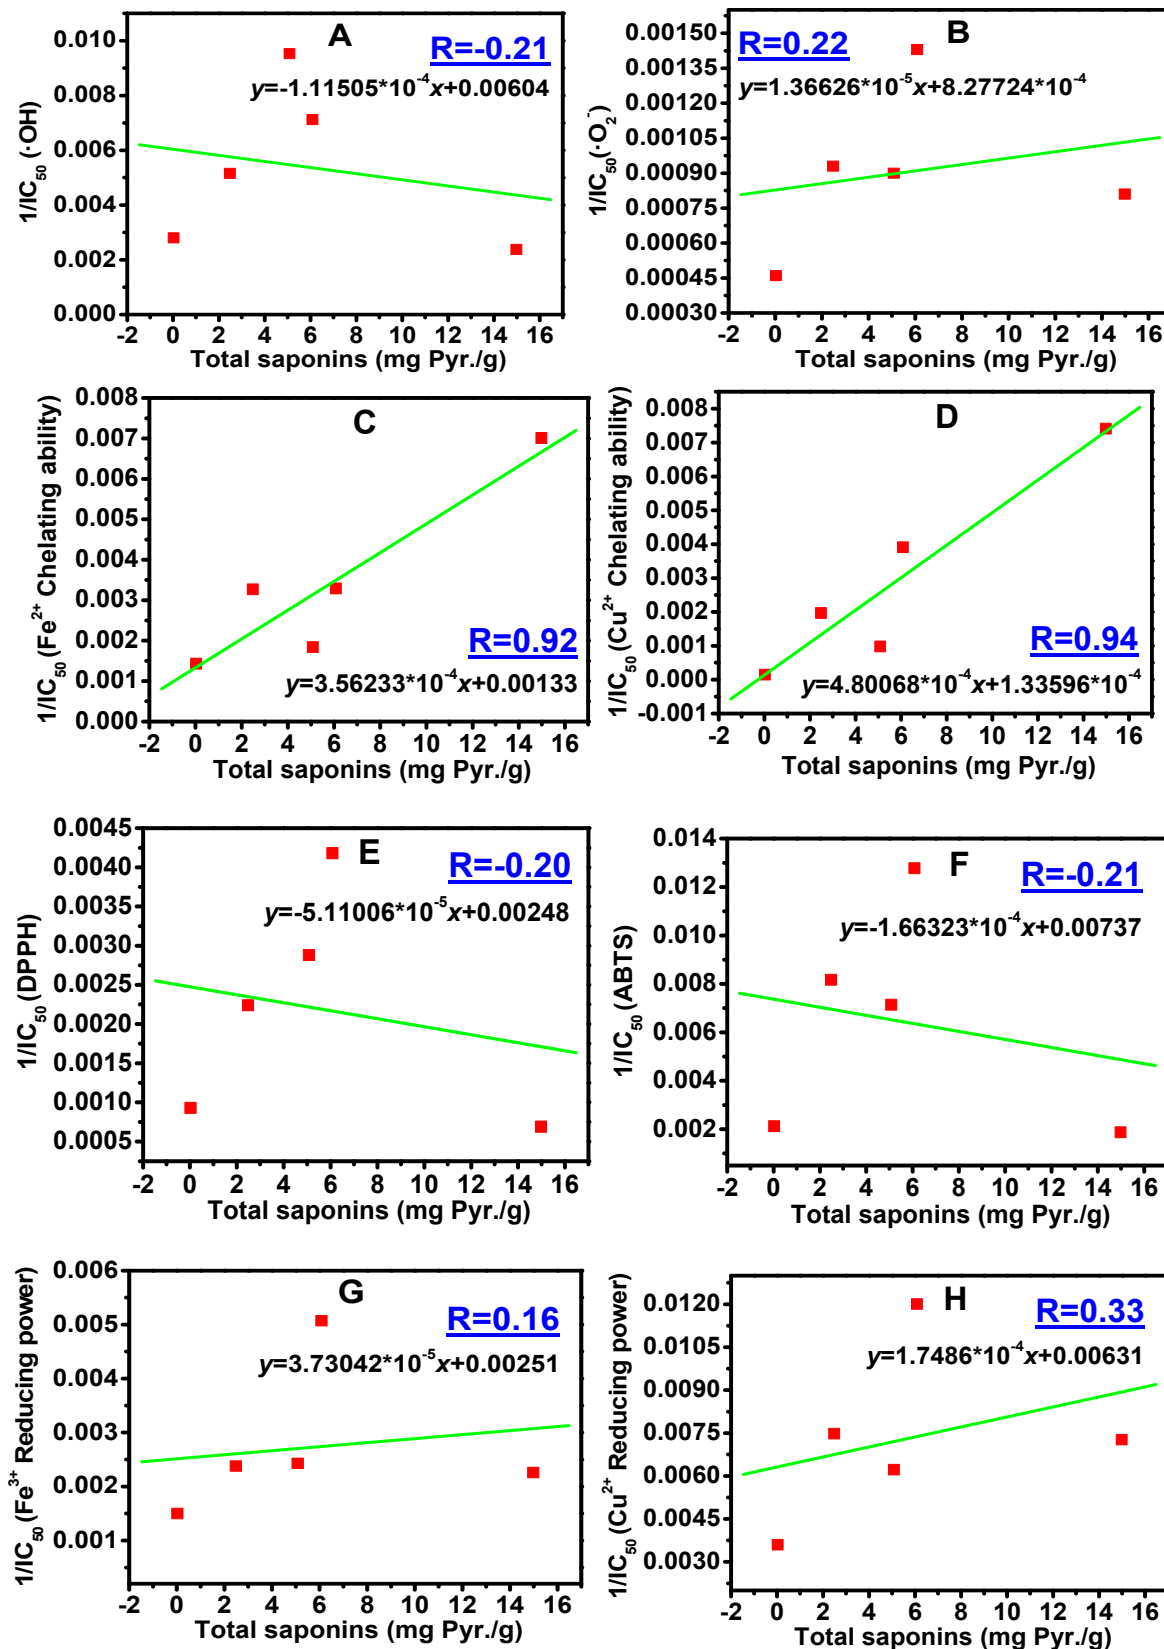

**Figure S6-5.** The correlation graphs between caffeic acid and antioxidant levels. (A) for  $\cdot\text{OH}$  assay; (B) for  $\cdot\text{O}_2^-$  assay; (C) for  $\text{Fe}^{2+}$  chelating ability assay; (D) for  $\text{Cu}^{2+}$  chelating ability assay; (E) for DPPH assay; (F) for ABTS assay; (G) for  $\text{Fe}^{3+}$  reducing power assay; (H) for  $\text{Cu}^{2+}$  reducing power assay.

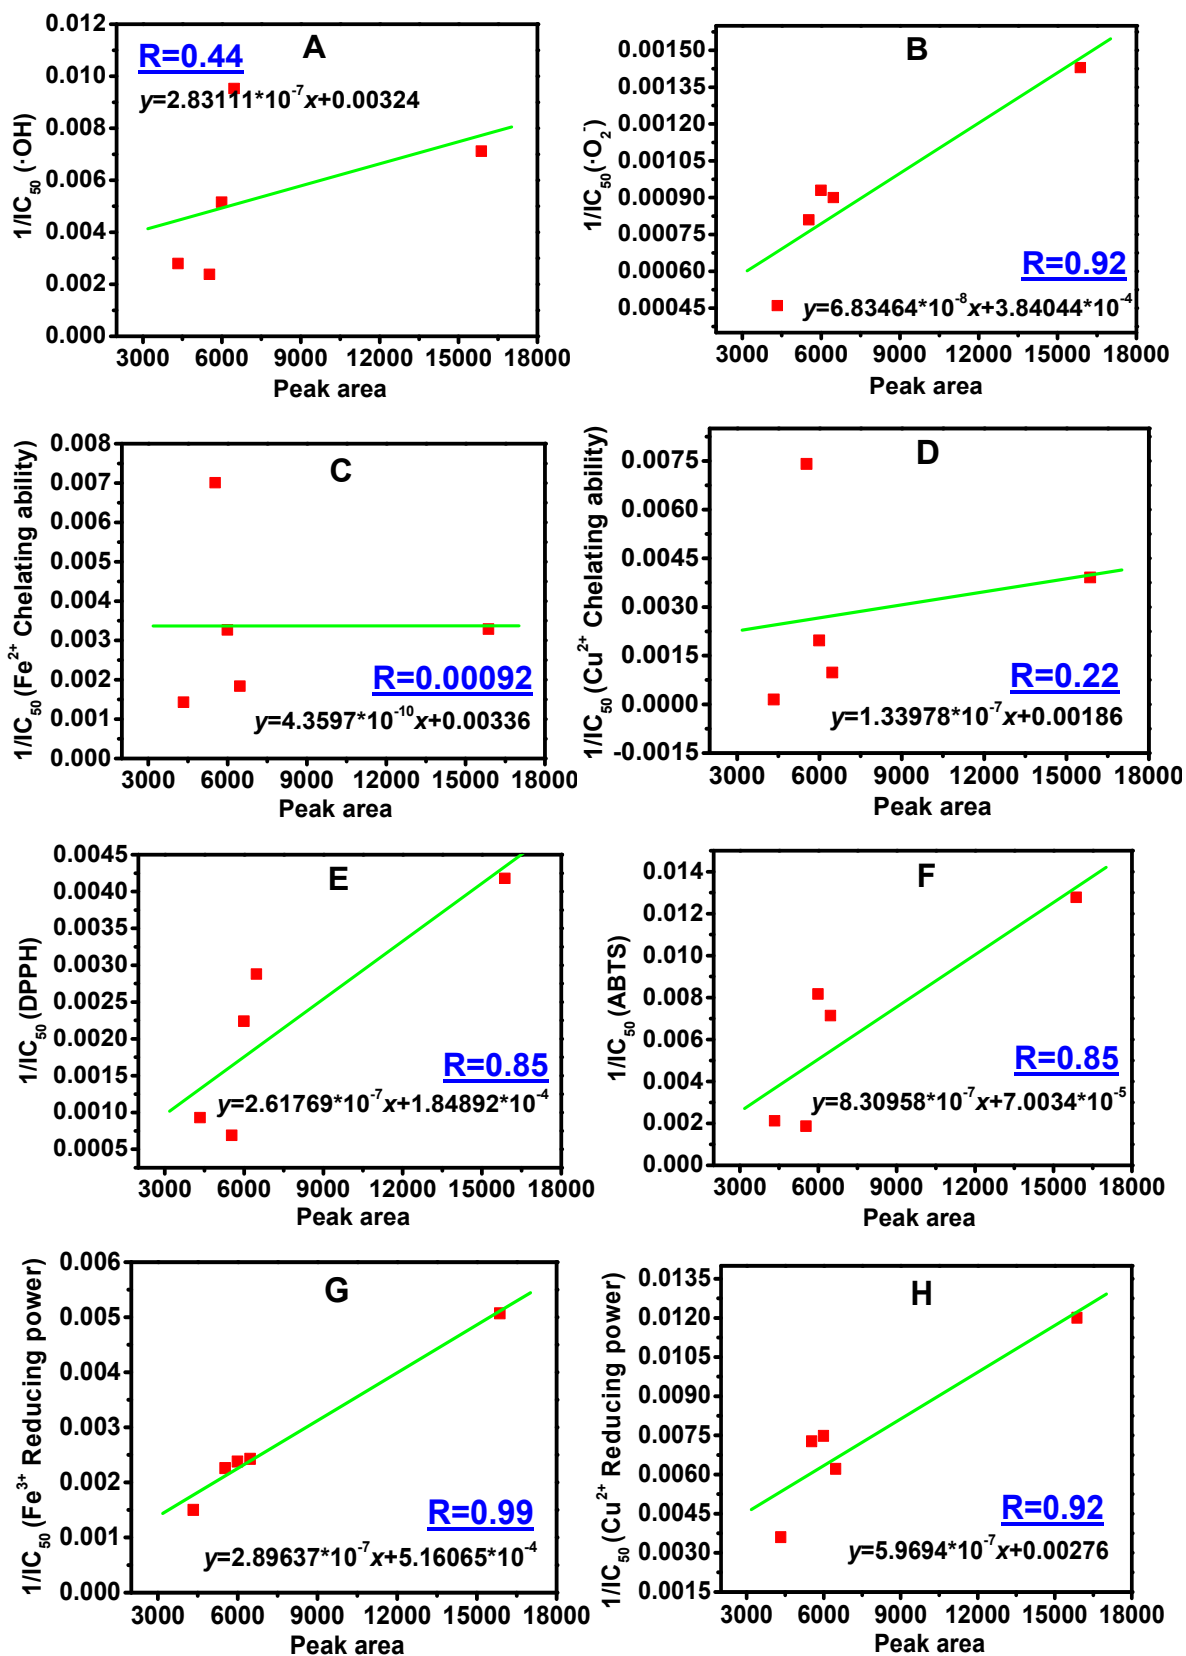

**Figure S6-6.** The correlation graphs between ferulic acid and antioxidant levels. (A) for  $\cdot\text{OH}$  assay; (B) for  $\cdot\text{O}_2^-$  assay; (C) for  $\text{Fe}^{2+}$  chelating ability assay; (D) for  $\text{Cu}^{2+}$  chelating ability assay; (E) for DPPH assay; (F) for ABTS assay; (G) for  $\text{Fe}^{3+}$  reducing power assay; (H) for  $\text{Cu}^{2+}$  reducing power assay.

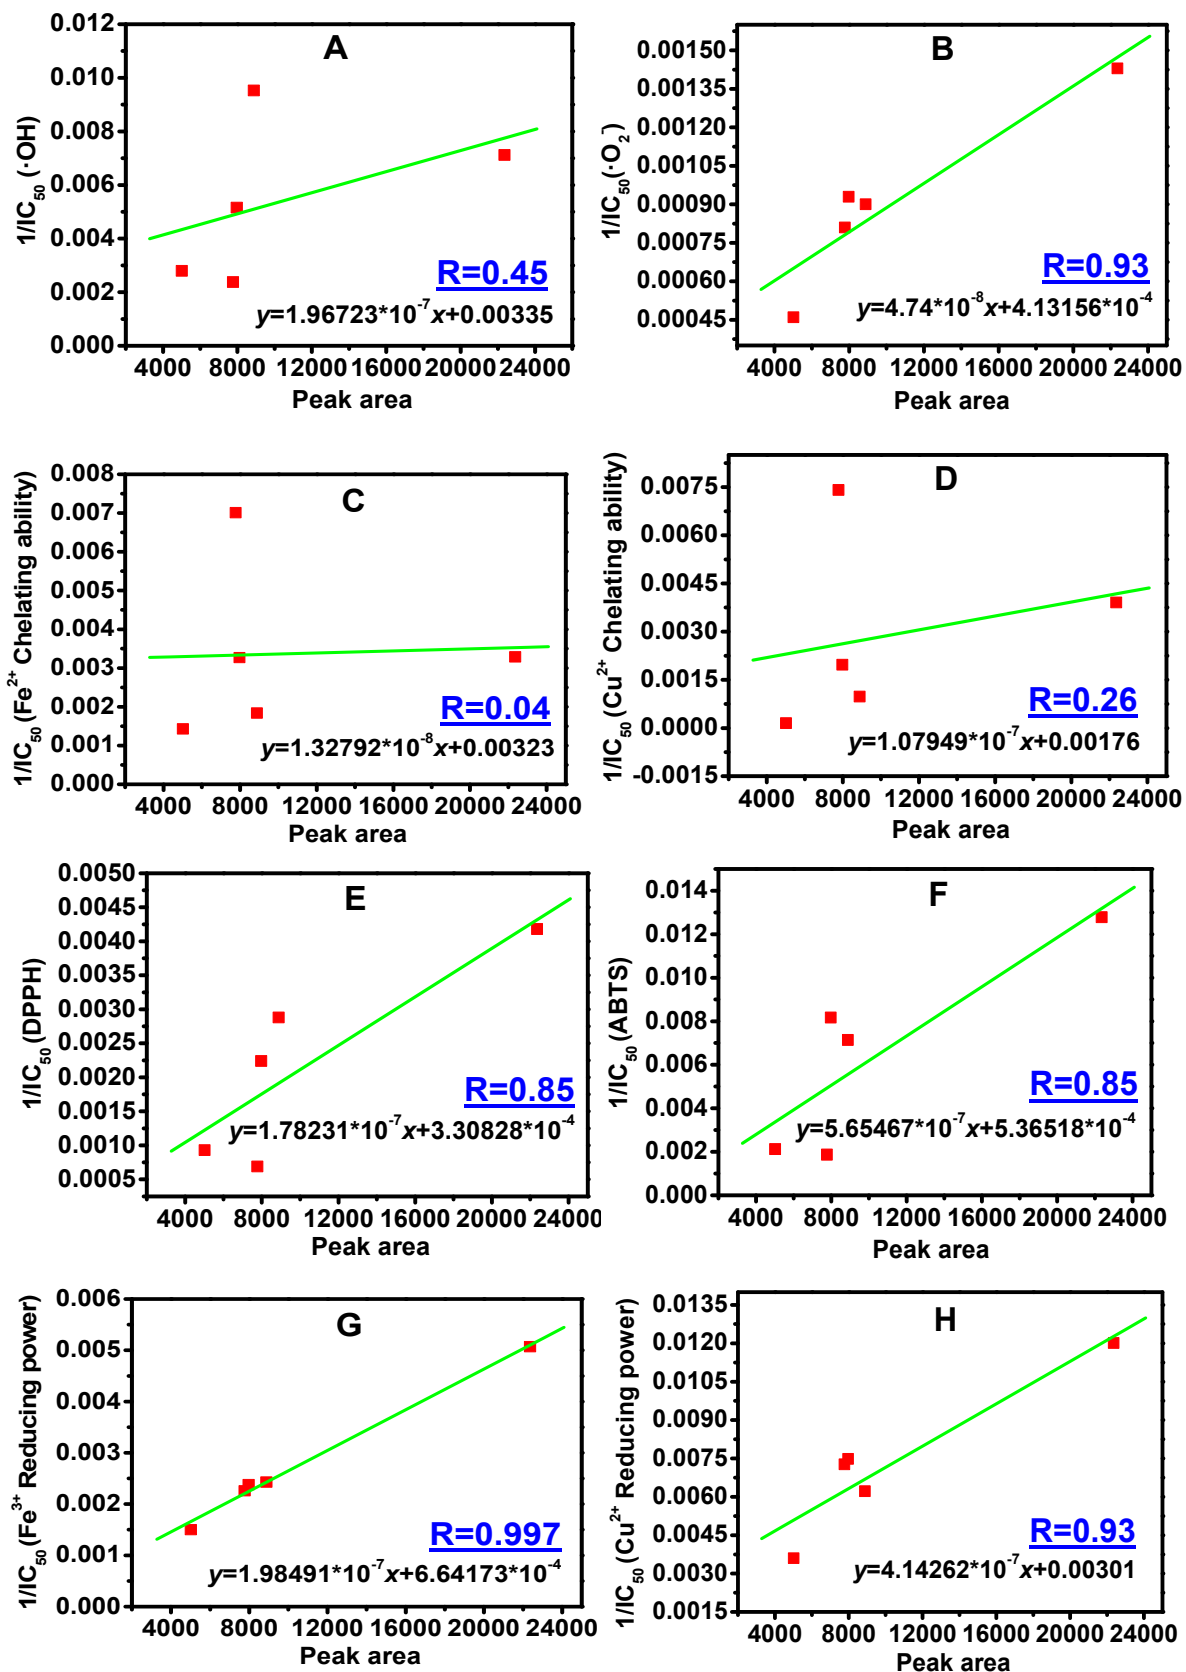

**Figure S6-7.** The correlation graphs between protocatechuic acid and antioxidant levels. (A) for  $\cdot\text{OH}$  assay; (B) for  $\cdot\text{O}_2^-$  assay; (C) for  $\text{Fe}^{2+}$  chelating ability assay; (D) for  $\text{Cu}^{2+}$  chelating ability assay; (E) for DPPH assay; (F) for ABTS assay; (G) for  $\text{Fe}^{3+}$  reducing power assay; (H) for  $\text{Cu}^{2+}$  reducing power assay.

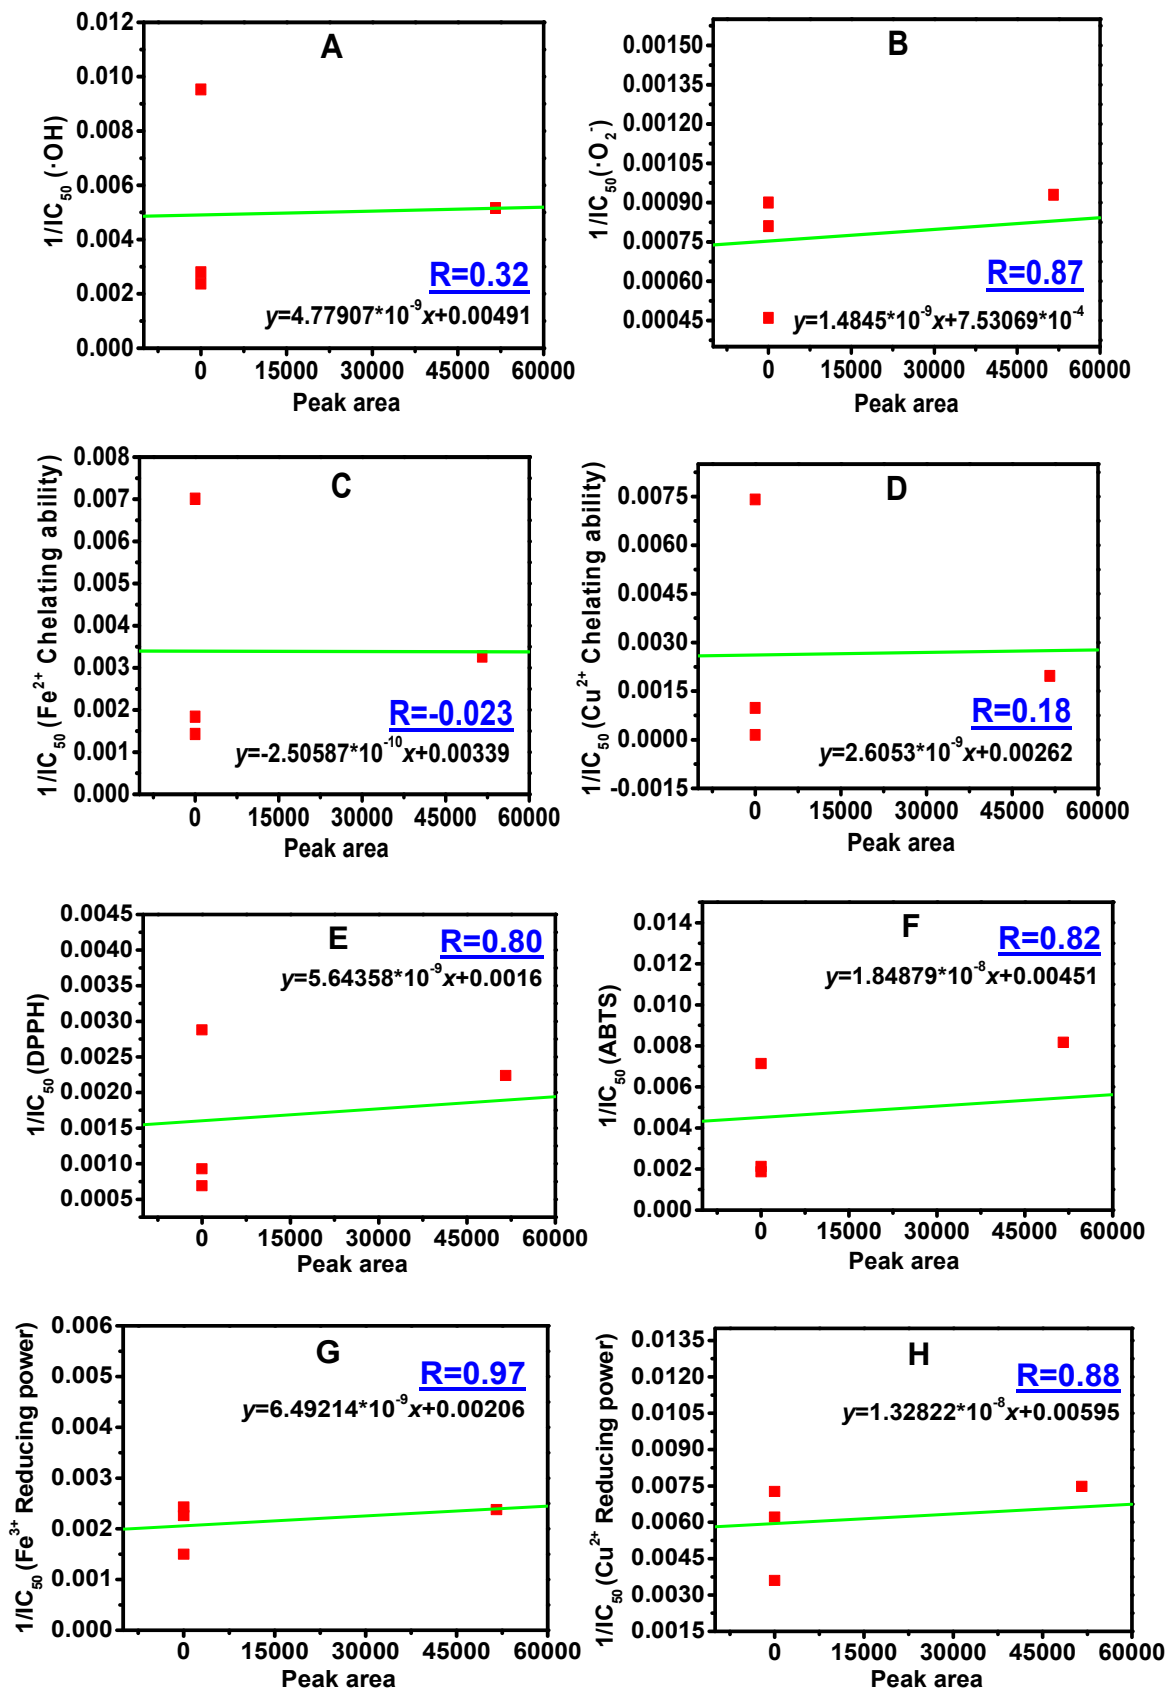

Supplement: molecules-17-13457-s001.pdf [file molecules-17-13457-s001.pdf]
